# Supplementary material for: Electromagnetic and Radon Earthquake Precursors
Source: Preprints.org preprint supplement (doi:10.20944/preprints202406.1939.v1), 2024-06-27
Supplement: Supplementary file 3 [file supplementary]

## REVIEWER GROUP 1

---

**1.** Panayiotis Varotsos, Professor

Solid Earth Physics Institute, Department of Physics, National and Kapodistrian University of Athens, Panepistimiopolis Zografos, 157 84 Athens, Greece

Specialisation ULF precursors, Natural Time. Founder of the VAN method. Aware of all types of ground-based stations and seismological models and processes

[panvar@phys.uoa.gr](mailto:panvar@phys.uoa.gr)

Characterisation: Esteemed Reviewer

---

**2.** Masashi Hayaka, Dr. of Engineering, Professor Emeritus

The University of Electro-Communications, Japan,

&

Hayakawa Institute of Seismo-Electromagnetics, Co. Ltd., University of Electro-Communications (UEC) Incubation Center, Tokyo 182-8585, Japan; Advanced Wireless Communications Research Center, University of Electro-Communications (UEC), Tokyo 182-0021, Japan; Earthquake Analysis Laboratory, Information Systems, Inc., Tokyo 107-0061, Japan

Specialisation ULF precursors, fractals, analysis techniques, remote sensor techniques, models and processes

[hayakawa@hi-seismo-em.jp](mailto:hayakawa@hi-seismo-em.jp)

Characterisation: Esteemed Reviewer

---

**3.** Vincenzo Lapenna, Director, Italian National Research Council

Specialisation: ULF, Electromagnetic precursors, analysis, SAR, Satellites, Earthquakes

[vincenzo.lapenna@imaa.cnr.it](mailto:vincenzo.lapenna@imaa.cnr.it)

Characterisation: Esteemed Reviewer

---

**4.** Sergey Pullinets, PhD in Geophysics, 1980 Habilitation in Radiophysics 1991 Group Leader at Space Research Institute

Specialisation: Satellites, Remote sensing techniques, Electromagnetic precursors, Founder of the LAIC model, Earthquakes

[pulse@cosmos.ru](mailto:pulse@cosmos.ru)

Characterisation: Esteemed Reviewer

---

**5.**Dr. Luciano Telesca, Institute of Methodologies for Environmental Analysis, National Research Council, 85050 Tito, PZ, Italy

Specialisation: geophysical time series analysis; statistical methods for the investigation of geophysical processes; point processes; fractals and multifractals; graphs and networks; complexity; information theory

[luciano.telesca@cnr.it](mailto:luciano.telesca@cnr.it)

Characterisation: Esteemed Reviewer

---

**6.**Patrick Richon, CEA, DAM, DIF, F-91297 Arpajon, France & Institut de Physique du Globe de Paris, Équipe Géologie des Systèmes Volcaniques, 4 place Jussieu, UMR-7154 CNRS, F-75005 Paris, France

Specialisation: radon in soil measurements, earthquakes

[patrick.richon@cea.fr](mailto:patrick.richon@cea.fr)

Characterisation: Esteemed Reviewer

---

**7.**Dr. Dimitar Ouzounov, Associate Professor, Research Faculty, Schmid College of Science and Technology; Physics

Website: <http://scholar.google.com/citations?user=OjOIDkYAAAAJ&hl=en>

Specialisation: Satellites, Earthquakes, Remote sensing, Models

[ouzounov@chapman.edu](mailto:ouzounov@chapman.edu)

Characterisation: Esteemed Reviewer

---

**8.**C. Tom Kuo, Department of Mineral and Petroleum Engineering, National Cheng Kung University, Tainan, Taiwan & NCKU Research and Development Foundation, Tainan, Taiwan

Corresponding author: Department of Mineral and Petroleum Engineering, National Cheng Kung University, Tainan, Taiwan;

Specialisation: Radon in water, models for radon, earthquakes

[mctkuobe@mail.ncku.edu.tw](mailto:mctkuobe@mail.ncku.edu.tw)

Characterisation: Esteemed Reviewer

## REVIEWER GROUP 2

**9.**Smirnova, Natalia, Institute of Physics, St Petersburg University.  
[nsmir@geo.phys.spbu.ru](mailto:nsmir@geo.phys.spbu.ru)

Related Research: Varlamov, A., Smirnova, N., Hayakawa, M. *et al.* Fractal characteristics of the ULF emissions along a meridian profile, based on the 210 MM stations data. Acta Geophys. 60, 928–941 (2012)

**10.**El-Nabushi, Rami-Ahmad,,Research Center for Quantum Technology, Faculty of Science, Chiang Mai University, Chiang Mai, 50200, Thailand.  
[el-nabulsi@atiner.gr](mailto:el-nabulsi@atiner.gr)

Related Research:Fractal dimension modeling of seismology and earthquakes dynamics.

**11.**Mokhtari Mohammad, International Institute of Earthquake Engineering and Seismology (IIEES), Tehran, Iran,  
[mokhtari@iiees.ac.ir](mailto:mokhtari@iiees.ac.ir)

Related Research: The distinct morphologic signature of underplating and seamounts in accretionary prisms, insights from thermomechanical modeling applied to Coastal Iranian Makran,

**12.**Ajay Kumar  
Associate Professor, Department of Mechanical Engineering Indian Institute of Technology (IIT) Tirupati (A.P.) – 517506 India, <https://iittp.ac.in/dr-ajay-kumar>  
[drajaykumarp@iittp.ac.in](mailto:drajaykumarp@iittp.ac.in)

Related research: Radon, earthquakes

**13.**Pradhan Biswajeet, Centre for Advanced Modelling and Geospatial Information System, School of Information, Systems and Modelling, Faculty of Engineering and Information Technology, University of Technology Sydney, NSW 2007, Ultimo, Australia  
[biswajeet24@gmail.com](mailto:biswajeet24@gmail.com)

Related Research: Estimation of fractal dimension and  $b$ -value of earthquakes in the Himalayan region.

**12.**Gupta, Sandeep, School of Health Sciences College of Health, Medicine and Wellbeing,  
[sandeep.gupta@newcastle.edu.au](mailto:sandeep.gupta@newcastle.edu.au)

Related Research: Scale invariance behaviour for pre and post-2015 Nepal Gorkha

earthquake GPS time series based on fractal analysis

**14.**Yaxin Bi, Professor in Artificial Intelligence, School of Computing and Mathematics, a core member of the Computer Science Research Institute at Ulster University,  
[y.bi@ulster.ac.uk](mailto:y.bi@ulster.ac.uk)

Related Research: SAR, Satellite

**15.**CHEN Weiyang, Associate Professor, Geophysics, Chaoyang District, Beijing, 100029, China, Chinese Academy of Sciences  
[cwy@mail.iggcas.ac.cn](mailto:cwy@mail.iggcas.ac.cn)

Related Research: TEM,modeling and inversion of TEM

**16.**Alessandro Ippolito,Research Scientist, Istituto Nazionale di Geofisica e Vulcanologia (INGV)  
[alessandro.ippolito@ingv.it](mailto:alessandro.ippolito@ingv.it)

Related Research:: LAIC model,Ionospheric anomalies, satellites

**17.**Zhong Li, Professor, Institute of intelligent emergency information Processing, Institute of Disaster Prevention, Langfang China, <https://www.cidp.edu.cn/english/info/1023/1112.htm>  
[lizhong@cidp.edu.cn](mailto:lizhong@cidp.edu.cn)

Related research: CSES satellite, 200 Hz-19,8kHz, Satellite,Remote sensing,  
Characterisation:mild referee

**18.** Mei Li, China Doctor of Philosophy, Earthquake Networks Center, China Earthquake Administration, No. 5, Sanlihe Nanheng Street, Xicheng District, 100045 Beijing, China,  
[limeixuxl@seis.ac.cn](mailto:limeixuxl@seis.ac.cn)

Related research: Satellite,Remote sensing  
Characterisation:low-to-mild referee
