# Supplementary material for: Electromagnetic and Radon Earthquake Precursors
Source: Preprints.org preprint supplement (doi:10.20944/preprints202406.1939.v1), 2024-06-27
Supplement: Supplementary file 9 [file supplementary]

# **Electromagnetic and radon earthquake precursors**

by

Dimitrios Nikolopoulos<sup>a</sup>

Demetrios Cantzos<sup>a</sup>

Aftab Alam

Stavros Dimopoulos<sup>a</sup>

Ermioni Petraki<sup>a</sup>

**<sup>a</sup>University of West Attica Department of Industrial Design and Production Engineering, Petrou Ralli & Thivon 250, Aigaleo, GR-12244, Athens, Greece;**

dniko@uniwa.gr (D.N.)

cantzos@uniwa.gr (D.C)

sdim@sdim.gr (S.D.)

ermionipetraki@gmail.com (E.P)

**<sup>b</sup>Centre for Earthquake Studies, National Centre for Physics, Shahdra Valley Road, P.O. Box No. 2141, Islamabad 44000, Pakistan**

aftab.alam@ncp.edu.pk (A.A.)

\* Correspondence: Dimitrios Nikolopoulos, *University of West Attica Department of Industrial Design and Production Engineering.*
